# Supplementary material for: 3D-conductive pathway written on leather for highly sensitive and durable electronic whisker
Source: Royal Society of Chemistry journal article supplement (doi:10.1039/d0tc00786b), 2020-01-01
Supplement: d0tc00786b1.pdf [file d0tc00786b1.pdf]

## Supporting information

# Written 3D-conductive Pathway in Leather for Highly Sensitive and Durable electronic whisker

*Ruijie Xie,<sup>†a</sup> Jingyu Zhu,<sup>†a</sup> Haibo Wu,<sup>†a</sup> Kang Zhang,<sup>a</sup> Binghua Zou,<sup>a</sup> Xueyan Zhang,<sup>a</sup> Jiayuan Liang,<sup>a</sup> Bing Zheng,<sup>a</sup> Sheng Li,<sup>a</sup> Weina Zhang,<sup>a</sup> Weihuang,<sup>a, b\*</sup> Jiansheng Wu<sup>a\*</sup> and Fengwei Huo<sup>a\*</sup>*

<sup>a</sup>Key Laboratory of Flexible Electronics (KLOFE) & Institute of Advanced Materials (IAM), Nanjing Tech University (NanjingTech), 30 South Puzhu Road, Nanjing 211816, P.R. China

<sup>b</sup> Shaanxi Institute of Flexible Electronics (SIFE), Northwestern Polytechnical University (NPU), 127 West Youyi Road, Xi'an 710072, P. R. China.

### **Corresponding author**

\*E-mail: iamfwhuo@njtech.edu.cn

\*E-mail: iamjswu@njtech.edu.cn

\*E-mail: iamwhuang@nwpu.edu.cn

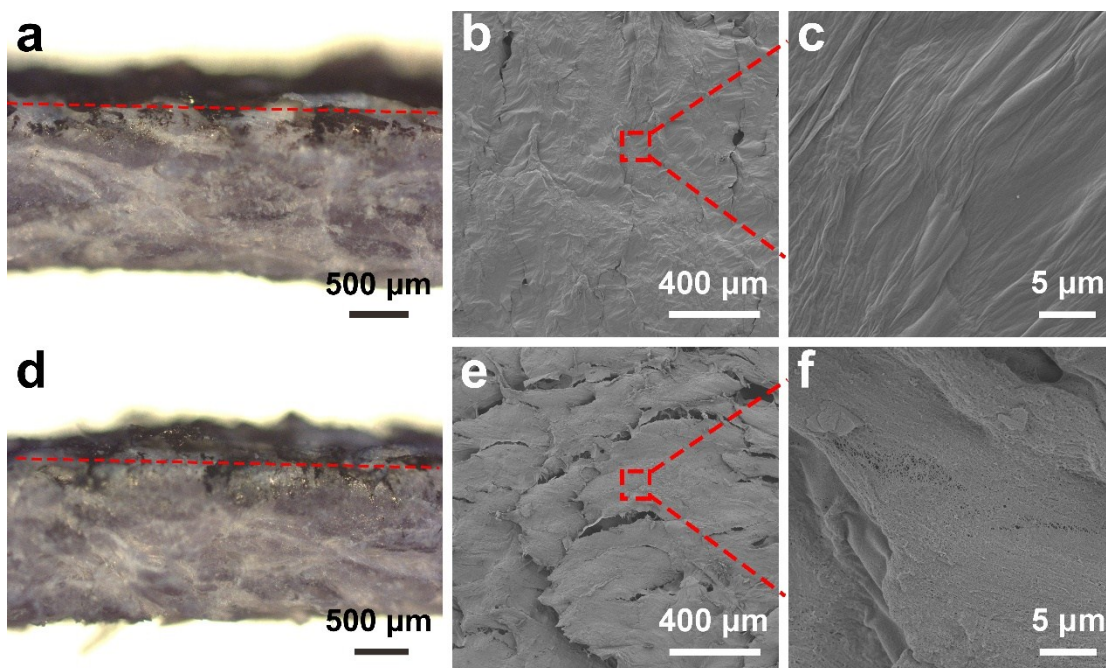

**Figure S1** a, d) Photographs of cross section of leather covered by GO (a) and SWCNT (d) respectively. b-c, e-f) SEM images of surface of leather covered by GO and SWCNT respectively.

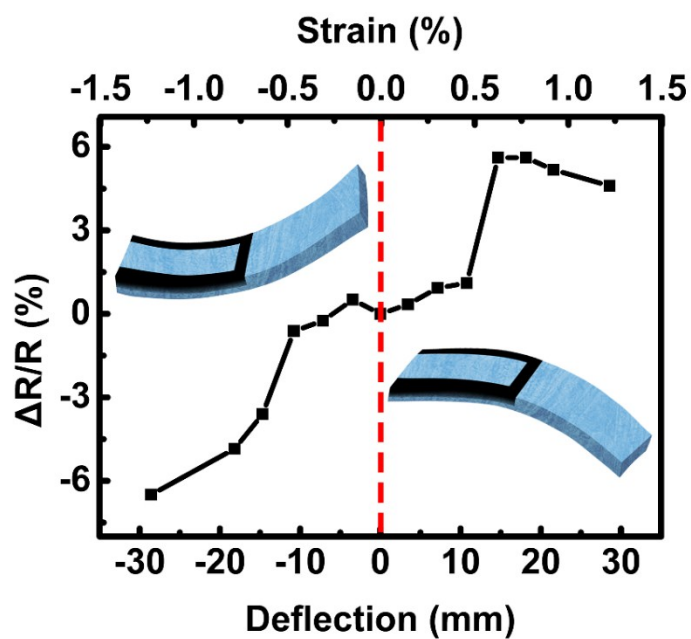

**Figure S2** Relative change of resistance of leather-based e-whisker assembled by SWCNT under different strains.

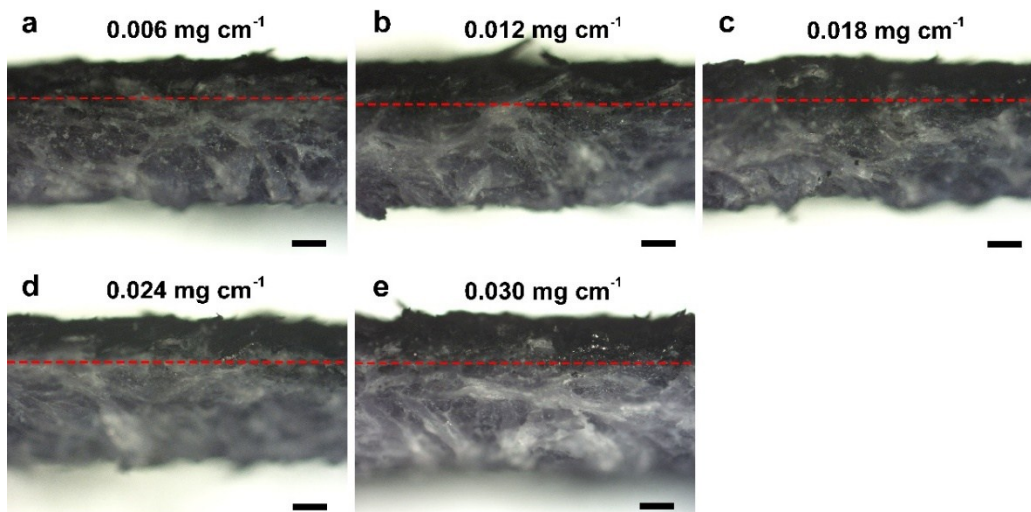

**Figure S3** Photographs of cross section of leather covered by different loadings of CB: a) 0.006 mg cm<sup>-1</sup>; b) 0.012 mg cm<sup>-1</sup>; c) 0.018 mg cm<sup>-1</sup>; d) 0.024 mg cm<sup>-1</sup>; e) 0.030 mg cm<sup>-1</sup>. Scale bars in a-e: 200 μm.

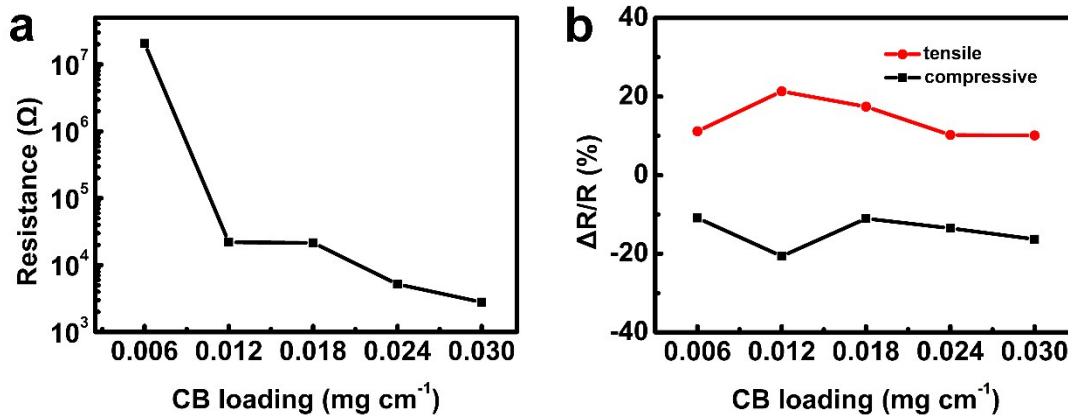

**Figure S4** a) Resistance of the leather-based e-whisker depending on the load of carbon black. b) Relative change of resistance of the leather-based e-whisker with different loadings of CB for the same deflection.

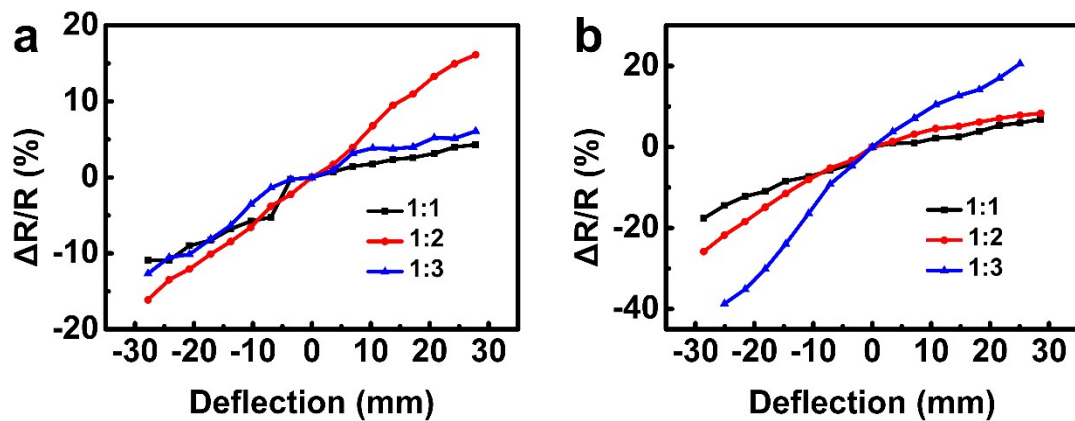

**Figure S5** a) Electrical signals response to different deflections for leather-based e-whiskers various in the length of conductive patterns. b) Electrical signals response to different deflections for leather-based e-whiskers with different length.

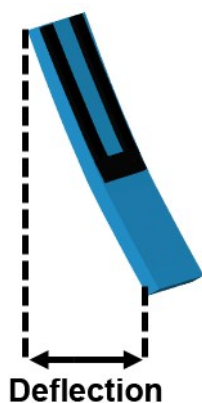

**Figure S6** The definition of deflection.

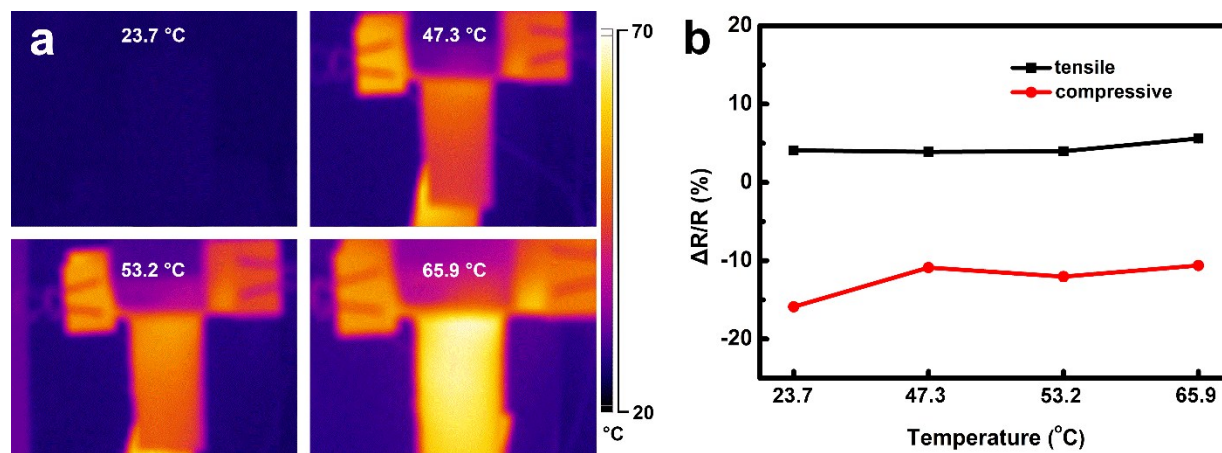

**Figure S7** a) Distribution of different temperatures on surface of leather-based e-whisker. b) Performance of leather-based e-whisker under different temperatures.

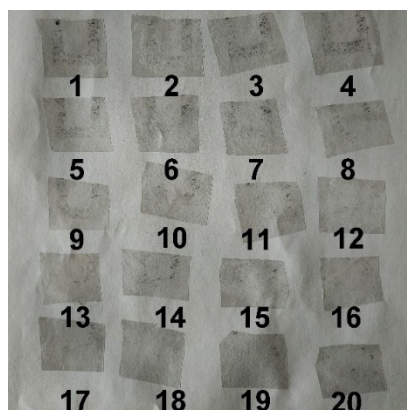

**Figure S8** Tapes after each peel test.

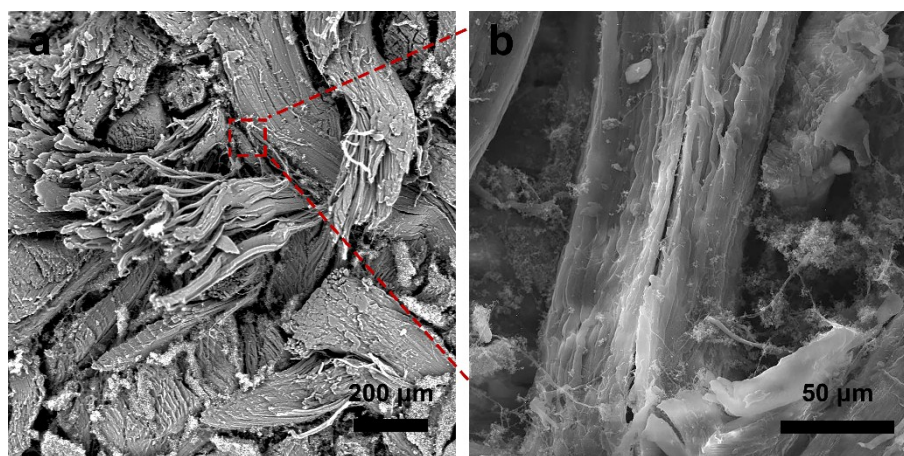

**Figure S9** a-b) SEM images of surface of leather-based e-whisker after the tape testing.

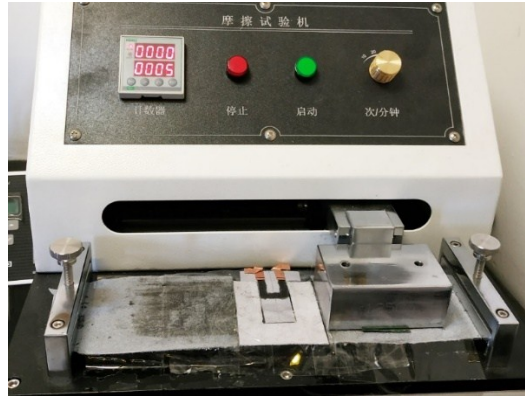

**Figure S10** Photograph of the process to test leather-based e-whisker's abrasion durability.

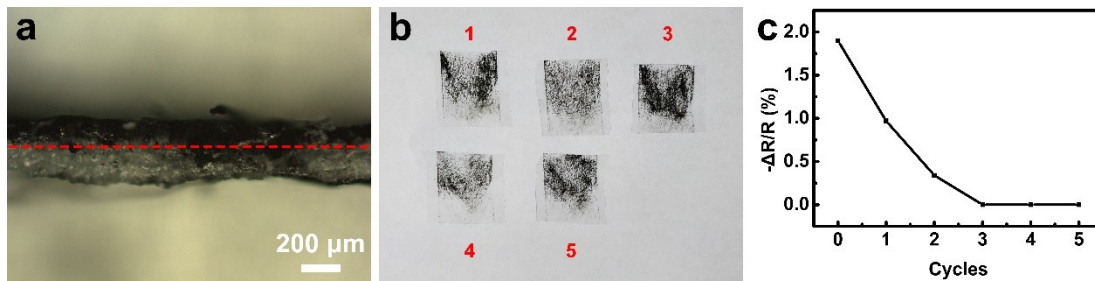

**Figure S11** a) Photograph of cross section of paper-based e-whisker. b) Tapes after each peel test for paper-based e-whisker. c) Performances of paper-based e-whisker after each tape test cycle.

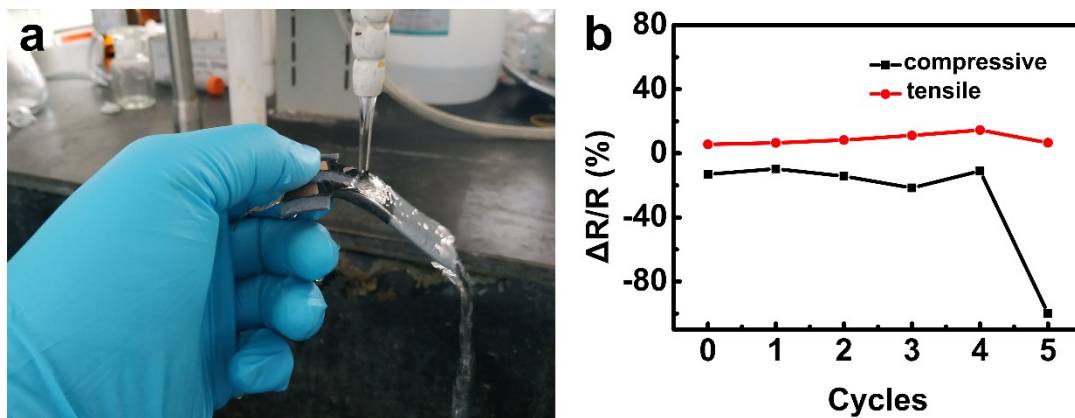

**Figure S12** a) Photograph of the process to test leather-based e-whisker's washing durability. b) Performances of leather-based e-whisker after each washing cycle.

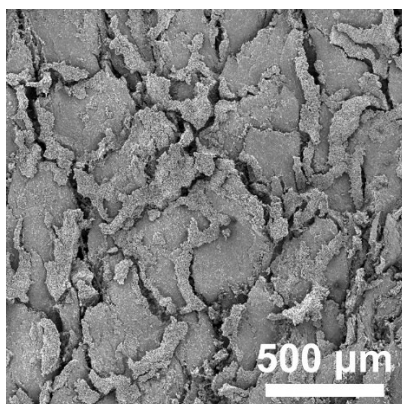

**Figure S13** SEM image of leather-based e-whisker after being washed for 25 min.

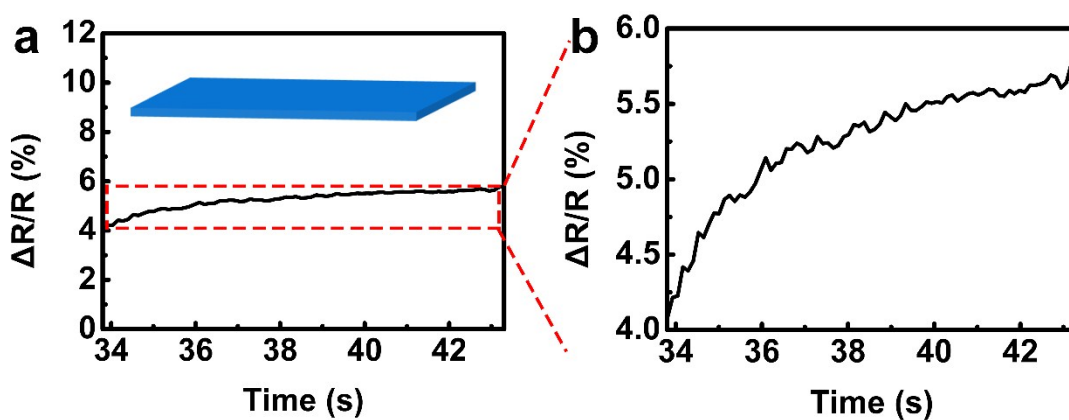

**Figure S14** a-b) Baseline (a) and background signal of leather-based e-whisker when scanning the surface of glass.

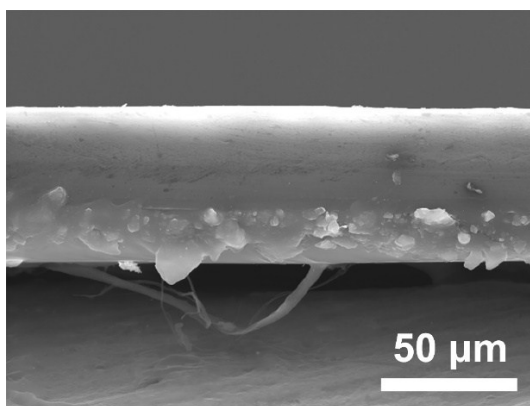

**Figure S15** SEM image of cross section of tape.

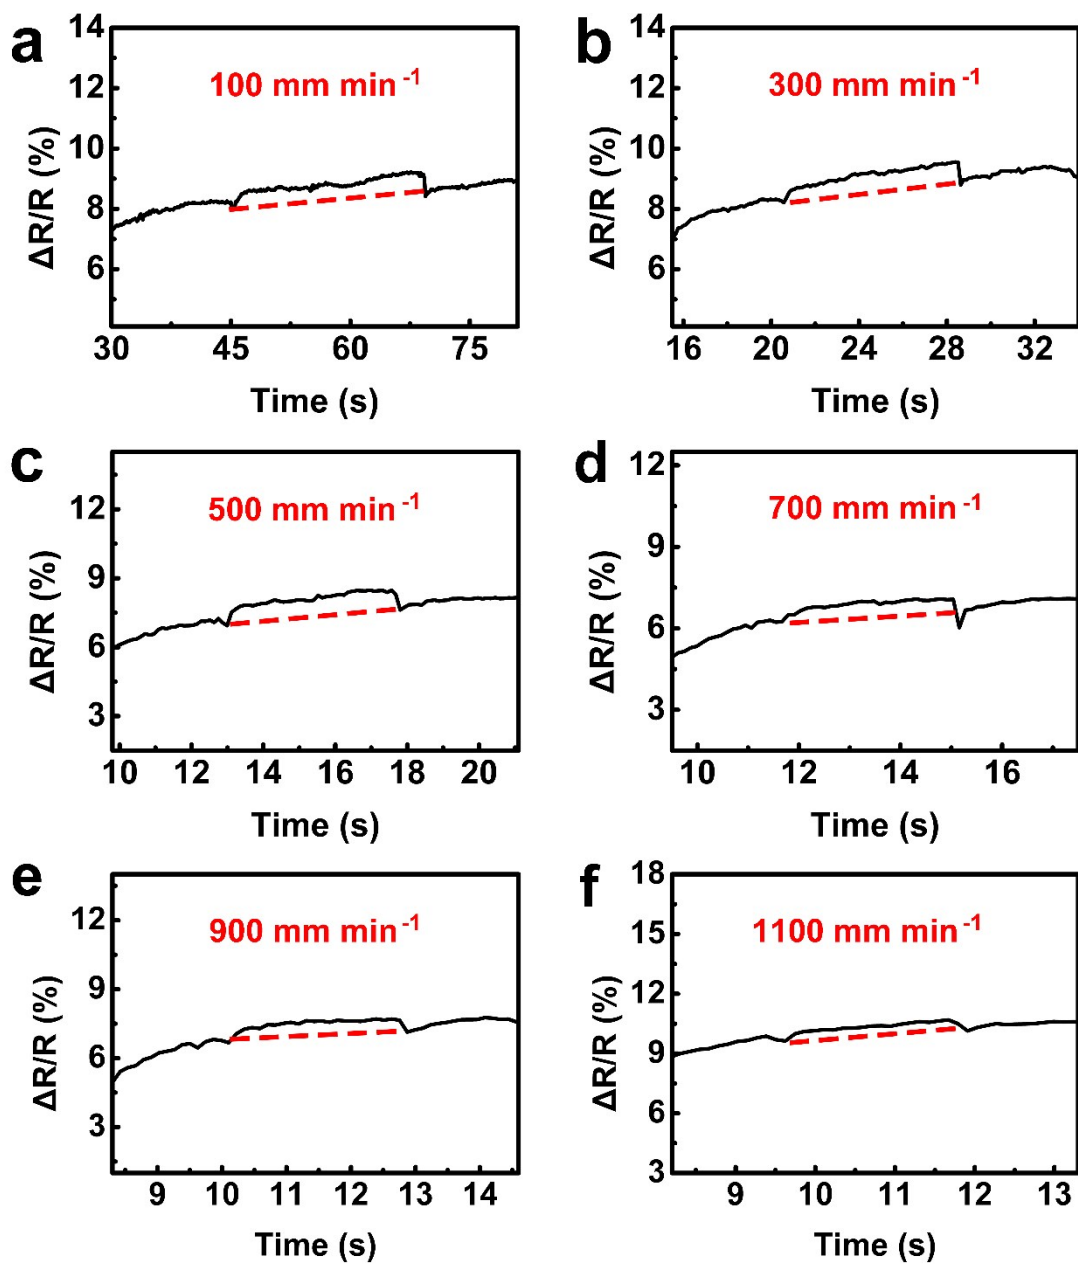

**Figure S16** Electrical signals of leather-based e-whisker respond to a height change of 50  $\mu\text{m}$  at different scanning speeds: 100  $\text{mm min}^{-1}$  (a), 300  $\text{mm min}^{-1}$  (b), 500  $\text{mm min}^{-1}$  (c), 700  $\text{mm min}^{-1}$  (d), 900  $\text{mm min}^{-1}$  (e), and 1100  $\text{mm min}^{-1}$  (f).



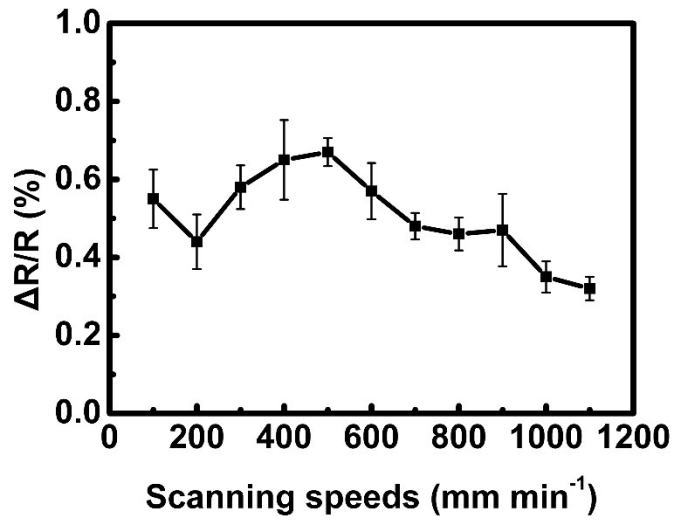

**Figure S17**  $\Delta R/R$  of leather-based e-whisker respond to a height change of 50  $\mu\text{m}$  at different scanning speeds.

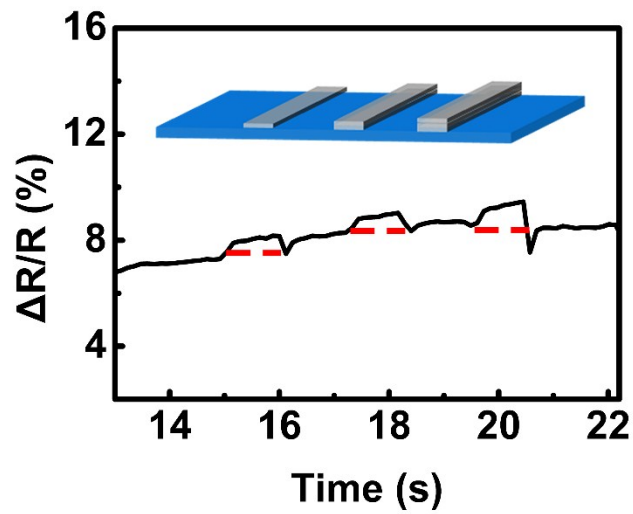

**Figure S18** Detection of surface that possess embossments with various height (50  $\mu\text{m}$ , 100  $\mu\text{m}$ , and 150  $\mu\text{m}$ ).

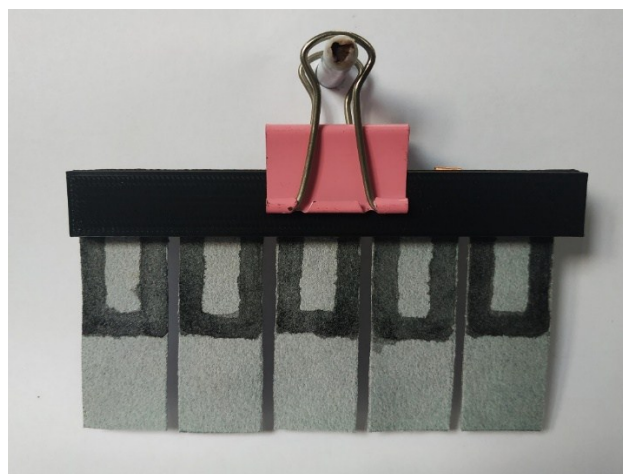

**Figure S19** Photograph of leather-based e-whisker array.

Table S1 Comparison between leather-based e-whisker and other e-whiskers

| Reference | Substrates           | Fabrication methods | Minimum detection height difference | Linearity          | Durability |
|-----------|----------------------|---------------------|-------------------------------------|--------------------|------------|
| 16        | PDMS                 | Painting            | No reported                         | Linear             | Poor       |
| 27        | Silicone, PET and PE | Screen printing     | 200 $\mu\text{m}$                   | Nonlinear          | Poor       |
| 29        | Paper                | Writing             | No reported                         | Two linear regions | Poor       |
| 37        | Polyurethane         | 3D-printing         | No reported                         | Linear             | Good       |
| This work | Leather              | Writing             | 50 $\mu\text{m}$                    | Two linear regions | Good       |
